# Supplementary material for: Selecting the appropriate indirect viability assay for 3D paper-based cultures: a data-driven study
Source: Royal Society of Chemistry journal article supplement (doi:10.1039/d3an00283g), 2023-01-01
Supplement: d3an00283g1.pdf [file d3an00283g1.pdf]

**SUPPORTING INFORMATION FOR**

# Selecting the appropriate indirect viability assay for 3D paper-based cultures: A data-driven study

Zachary R. Sitte <sup>a</sup>, Tyler S. Larson <sup>a</sup>, Julie C. McIntosh <sup>a</sup>, Melanie Sinanian <sup>a</sup>, and  
Matthew R. Lockett <sup>a,b\*</sup>

<sup>a</sup> Department of Chemistry, University of North Carolina at Chapel Hill, Kenan and Caudill  
Laboratories, 125 South Road, Chapel Hill, NC 27599-3290

<sup>b</sup> Lineberger Comprehensive Cancer Center, University of North Carolina at Chapel Hill, 450  
West Davis Drive, Chapel Hill, NC 27599-7295

\* Author to whom correspondence should be addressed: [mlockett@unc.edu](mailto:mlockett@unc.edu)

| <b>Table of Contents</b> |                                                                                                                                                                                                         | <b>Page</b> |
|--------------------------|---------------------------------------------------------------------------------------------------------------------------------------------------------------------------------------------------------|-------------|
| Figure S1                | Schematic and photograph paper scaffolds                                                                                                                                                                | S3          |
| Figure S2                | Resazurin dye optimization                                                                                                                                                                              | S4          |
| Table S1                 | Summary of resazurin datasets in Figure S2                                                                                                                                                              | S5          |
| Figure S3                | Calibration and dose-response curves for PI labeling<br>imaged on a confocal laser scanner                                                                                                              | S6          |
| Figure S4                | Calibration curves of indirect assays for a second replicate culture                                                                                                                                    | S7          |
| Table S2                 | Analytical figures of merit, determined from the best-fit least square<br>linear regression of datasets in Figure S4                                                                                    | S8          |
| Figure S5                | Untransformed datasets from calcein-AM and CTG calibration curves                                                                                                                                       | S9          |
| Table S3                 | Analytical figures of merit, determined from the best-fit least square<br>linear regression of the PI-stained cell dataset in Figure 2                                                                  | S10         |
| Figure S6                | Representative confocal micrographs of cell-laden scaffolds                                                                                                                                             | S11         |
| Figure S7                | Cellular and assay responses under hypoxic conditions                                                                                                                                                   | S12         |
| Table S4                 | 95% confidence interval values from fitted dose-response curves<br>of HCT116 cells dosed with SN-38                                                                                                     | S13         |
| Figure S8                | Fluorescence intensity comparison of 20,000 HCT116 cells in paper<br>scaffolds incubated overnight in hypoxia or normoxia, followed by a 4 h<br>incubation at normoxia before analysis with PI staining | S14         |

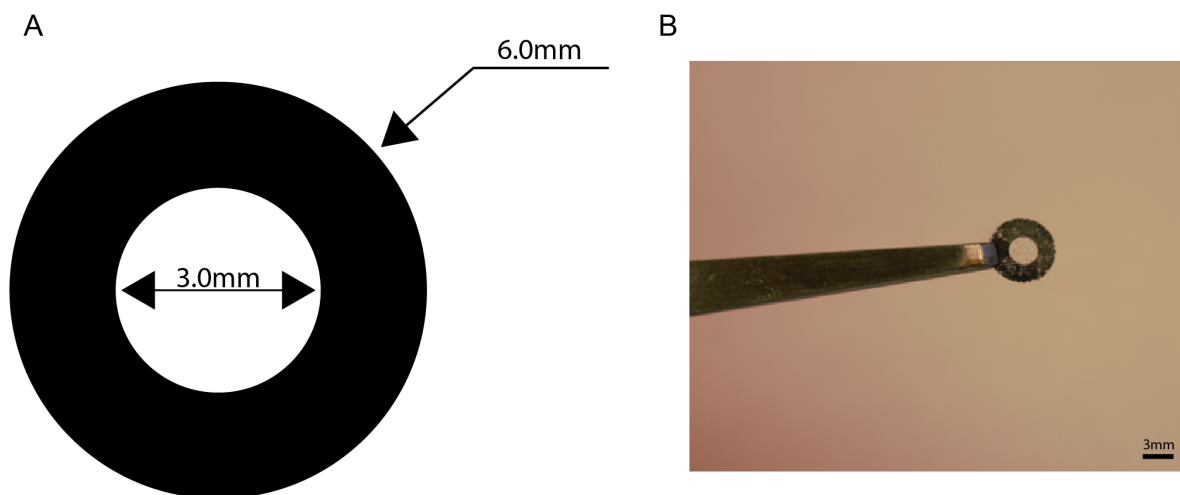

Figure S1. (A) Schematic and (B) photograph of the paper scaffolds used in this work. Each scaffold was printed as 6.0 mm in diameter and had a 3 mm diameter culture area surrounded by a 1.5 mm wax boundary. These dimensions are for the as-printed wax design, which can spread upon baking the scaffolds to give slightly different values. The scaffolds readily fit into the well of a standard 96-well plate.

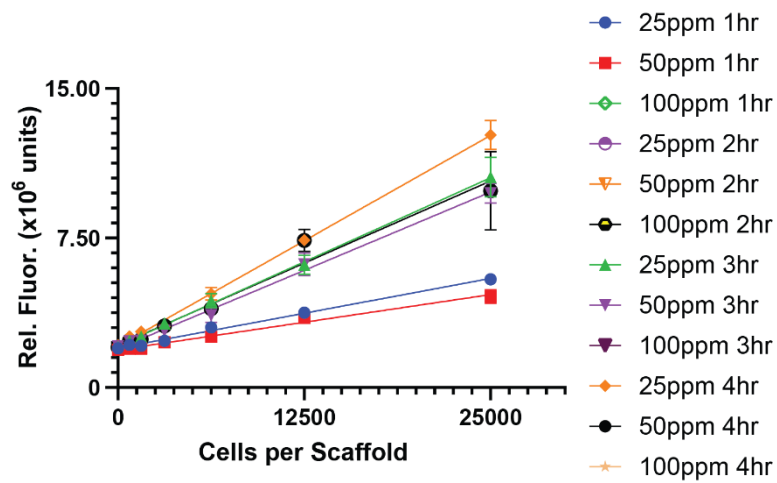

Figure S2. Optimization of resazurin data. Fluorescence datasets were obtained by incubating paper scaffolds containing 0-25,000 HCT116 cells in freshly prepared resazurin solutions. Each dataset was fit with a least-squares linear regression. Each point corresponds to the average and standard deviation of at least 4 separate cultures, prepared from at least 1 passage of cells.

Table S1. Summary of resazurin datasets obtained in Figure S2. <sup>a</sup>

| <b>Time (h)</b> | <b>Resazurin concentration (ppm)</b> | <b>Sensitivity (RFU/cell)</b> | <b>LoD<sup>b</sup> (Cells)</b> | <b>LoQ<sup>b</sup> (Cells)</b> |
|-----------------|--------------------------------------|-------------------------------|--------------------------------|--------------------------------|
| 1               | 25                                   | 165.0                         | 644                            | 1615                           |
|                 | 50                                   | 109.1                         | 1686                           | 5061                           |
| 3               | 25                                   | 373.5                         | 849                            | 2814                           |
|                 | 50                                   | 249.3                         | 826                            | 2622                           |
| 4               | 25                                   | 391.3                         | 496                            | 1671                           |
|                 | 50                                   | 310.8                         | 500                            | 1864                           |

<sup>a</sup> Values based on at least 4 separate cell-containing scaffolds, prepared from at least 1 passage of HCT116 cells.

<sup>b</sup> Limit of detection (LOD) and limit of quantification (LOQ) values were calculated using Eqns. 1 and 2 in the main text.

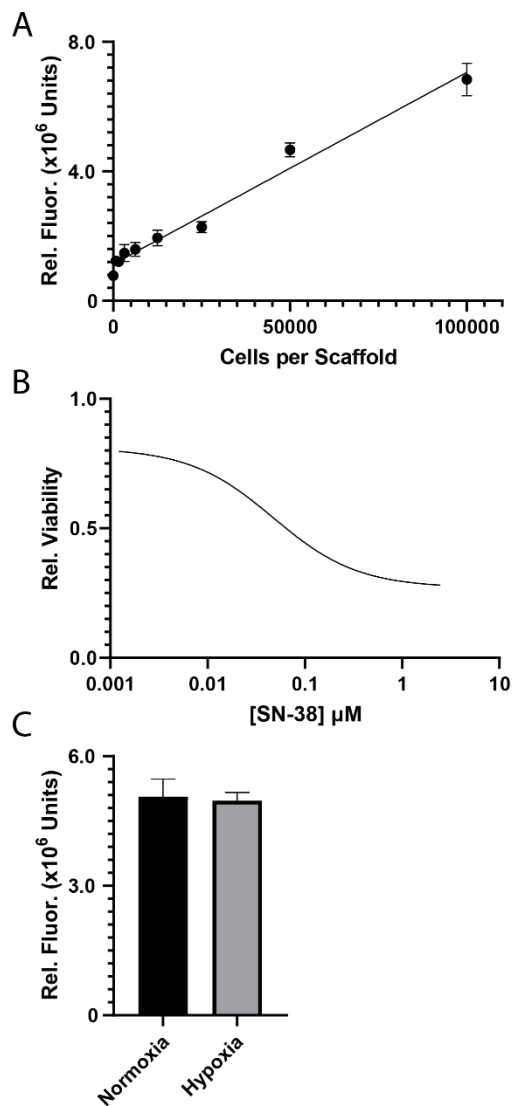

Figure S3. Evaluation of the propidium iodide-staining of cell-containing paper scaffolds using a flatbed scanner. A) Calibration curve prepared with HCT116 cells suspended in Matrigel for a final density ranging from 0–100,000 cells/scaffold. Values represent at least 4 separate cultures, prepared from at least 1 passage of cells. B) Dose-response relationship of 25,000 HCT116 cells treated with increasing concentrations of SN-38 for 48 h. Values represent at least 8 separate cultures, prepared from at least 2 passages of cells. C) Fluorescence intensity of 25,000 HCT116 cells in paper scaffolds after an overnight incubation under normoxic or hypoxic culture conditions. Values represent at least 8 separate cultures, prepared from at least 2 passage of cells.

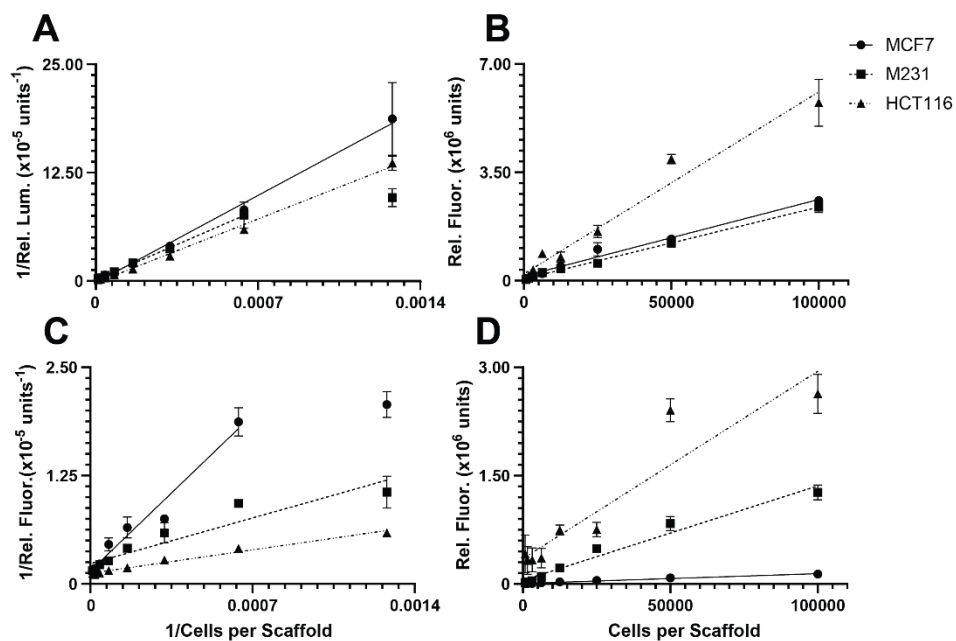

Figure S4. Calibration curves prepared from a second pass of each cell line. Each scaffold was deposited with either MCF7, M231, or HCT116 cells suspended in Matrigel for a final density ranging from 0–100,000 cells/scaffold. Background signals were determined from cell-free scaffolds. Datasets were fit with a least-square linear regression the A) CTG assay, B) resazurin assay, C) calcein-AM staining, and D) imaging of fluorescent proteins. All values are from at least 3 separate cultures, prepared from at least 1 passage of cells.

Table S2. Analytical figures of merit determined from the second replicate of the best-fit least square regression. <sup>a</sup>

|                          | CellTiter-Glo 2.0 | Resazurin      | Calcein-AM     | Fluorescent Protein |
|--------------------------|-------------------|----------------|----------------|---------------------|
| <b>HCT116 Cells</b>      |                   |                |                |                     |
| LoD (cells) <sup>b</sup> | 7                 | N/A            | 1              | N/A                 |
| LoQ (cells) <sup>b</sup> | 23                | 3,457          | 4              | N/A                 |
| Linear Range (cells)     | 781-100,000       | 781-100,000    | 781-100,000    | 781-100,000         |
| Slope <sup>c</sup>       | 9.53              | 58.83          | 4649.00        | 25.96               |
| Noise <sup>d</sup>       | 22.33             | 41,954.15      | 112.95         | 60,610.70           |
| CV <sup>b,e</sup>        | 0.18<br>(0.08)    | 0.28<br>(0.08) | 0.15<br>(0.16) | 0.85<br>(0.13)      |
| R <sup>2</sup>           | 0.995             | 0.969          | 0.981          | 0.879               |
| <b>M231 Cells</b>        |                   |                |                |                     |
| LoD (cells) <sup>b</sup> | 87                | 9,023          | 7              | N/A                 |
| LoQ (cells) <sup>b</sup> | 290               | 35,512         | 22             | N/A                 |
| Linear Range (cells)     | 1,562-100,000     | 781-100,000    | 781-100,000    | 781-100,000         |
| Slope <sup>c</sup>       | 8.64              | 23.24          | 132.84         | 13.08               |
| Noise <sup>d</sup>       | 249.74            | 87,940.00      | 294.75         | 1,304.84            |
| CV <sup>b,e</sup>        | 0.19<br>(0.09)    | 0.76<br>(0.26) | 0.40<br>(0.13) | 0.49<br>0.23        |
| R <sup>2</sup>           | 0.999             | 0.997          | 0.887          | 0.970               |
| <b>MCF7 Cells</b>        |                   |                |                |                     |
| LoD (cells) <sup>b</sup> | 30                | N/A            | 29             | 2,071               |
| LoQ (cells) <sup>b</sup> | 99                | 3,530          | 97             | 19,077              |
| Linear Range (cells)     | 781-100,000       | 3125-100,000   | 1562-100,000   | 781-100,000         |
| Slope <sup>c</sup>       | 6.96              | 24.76          | 38.88          | 1.36                |
| Noise <sup>d</sup>       | 69.16             | 23,335.89      | 373.35         | 3,301.44            |
| CV <sup>b,e</sup>        | 0.16<br>(0.15)    | 0.51<br>(0.08) | 0.10<br>(0.19) | 0.96<br>(0.42)      |
| R <sup>2</sup>           | 0.995             | 0.981          | 0.966          | 0.981               |

<sup>a</sup> Values are based on at least 3 separate cell-containing scaffolds obtained from at least 1 cell passage.

<sup>b</sup> Values are based on the IUPAC definition: LOD is the background signal plus 3 times the standard deviation of the blank and LOQ is the background signal plus 10 times the standard deviation of the blank.

<sup>c</sup> Slope values for the CTG and calcein-AM assays are the inverse of the transformed dataset to maintain a unit of readout unit per cell.

<sup>d</sup> Noise is the standard deviation of the signal from the blank.

<sup>e</sup> Coefficient of variation is the standard deviation at the given value divided by the average signal at the given value. Values are based on a low cell count of 3,125 cells per scaffold and a high cell count of 50,000 cells per scaffold.



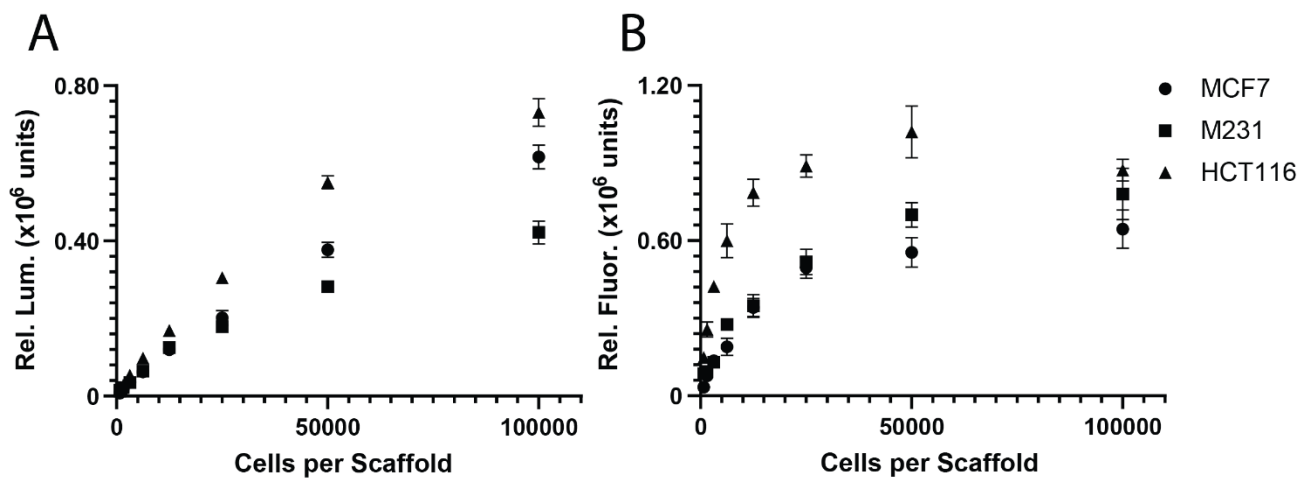

Figure S5. Raw signal vs. cell number datasets for the A) CTG assay and B) calcein-AM staining. These datasets were linearized in the main text with a Lineweaver-Burke transformation (Figure 3).

Table S3. Analytical figures of merit determined from the analysis with propidium iodide using HCT116 cells of the least-square linear regression. <sup>a</sup>

|                                         | <b>PI</b>   |
|-----------------------------------------|-------------|
| LOD (cells) <sup>b</sup>                | 6,641       |
| LOQ (cells) <sup>b</sup>                | 24,465      |
| Linear Range (cells)                    | 781-100,000 |
| Slope                                   | 2.28        |
| Noise <sup>c</sup>                      | 5,803       |
| Coefficient of variation <sup>b,d</sup> | 0.09        |
|                                         | 0.16        |
| R <sup>2</sup>                          | 0.986       |

<sup>a</sup> Values based on at least 3 separate cell-containing scaffolds obtained from at least 1 cell passage.

<sup>b</sup> Values are based on the IUPAC definition: LOD is the background signal plus 3 times the standard deviation of the blank and LOQ is the background signal plus 10 times the standard deviation of the blank.

<sup>c</sup> Noise is defined as the standard deviation of the signal from the blank.

<sup>d</sup> Coefficient of variation is the standard deviation at the given value divided by the average signal at the given value. Values are based on a low cell count of 3,125 cells per scaffold and a high cell count of 50,000 cells per scaffold.

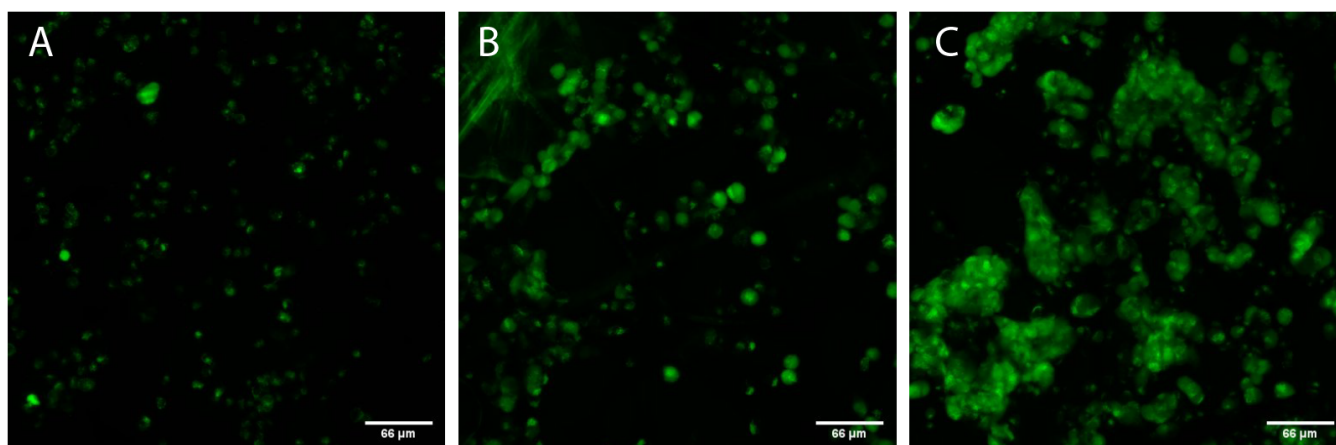

Figure S6. Representative confocal micrographs of the direct viability measurement in paper scaffolds used to calculate the  $IC_{50}$  of SN-38 after a 48 h dose at A)  $2.5\mu\text{M}$ , B)  $0.156\mu\text{M}$ , or C)  $0.001\mu\text{M}$ . Images represent 1 scaffold, prepared from 1 passage of cells. The above micrographs were collected on a Zeiss LSM 710 spectral confocal laser scanning microscope with a 20X/0.80 Plan Apo objective, with a Z-resolution of  $2\mu\text{m}$ .

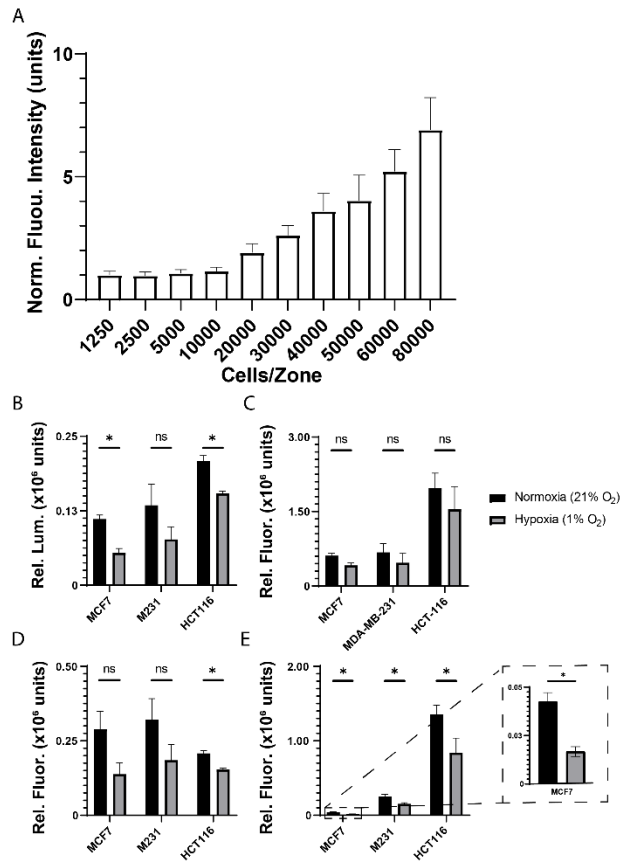

Figure S7. Evaluation of cellular and assay responses under hypoxic conditions. A) Fluorescence intensity of paper scaffolds with increasing densities of M231-HRE cells, corrected for cell number and normalized to scaffolds containing 1,250 cells/scaffold. These cells were engineered to express eGFP upon stabilization of hypoxia-inducible factor alpha, a canonical transcription factor indicative of cellular hypoxia. Fluorescence intensity is directly proportional to the extent and duration of hypoxia. B-E) Background corrected signal intensities of 10,000 or 40,000 cells per scaffold after a 24 h incubation in either normoxic (20% pO<sub>2</sub>) or hypoxic (1% pO<sub>2</sub>) conditions, determined with the B) CTG, C) resazurin (25 ppm resazurin incubated for 1 h), D) calcein-AM, and E) fluorescent protein assay. The datasets in A) represent  $\geq 12$  cultures prepared from  $\geq 2$  cell passages. The datasets in B-E) represent  $\geq 7$  cultures, prepared from  $\geq 2$  cell passages.

Table S4. 95% confidence interval values from fitted dose-response relationships of HCT116 cells with SN-38 in paper scaffolds. <sup>a</sup>

|                       | <b>CTG</b> | <b>Resazurin</b> | <b>Calcein-AM</b> | <b>Fluorescent protein</b> | <b>Direct</b> |
|-----------------------|------------|------------------|-------------------|----------------------------|---------------|
| IC <sub>50</sub> (nM) | 42.6-276.3 | 6.4-596.6        | 47.5-678.3        | 18.4-9959                  | 7.8-291.3     |
| Span                  | 0.03-1.01  | 0.43-1.01        | 0.02-1.18         | -1.86-1.01                 | -1.15-15.99   |

<sup>a</sup> Values are based on at least 7 separate cell-containing scaffolds obtained from at least 2 cell passages for CTG, Resazurin, calcein-AM, and fluorescent protein. For the direct viability measure, values are based on at least 2 separate cell-containing scaffolds obtained from at least 1 cell passage.

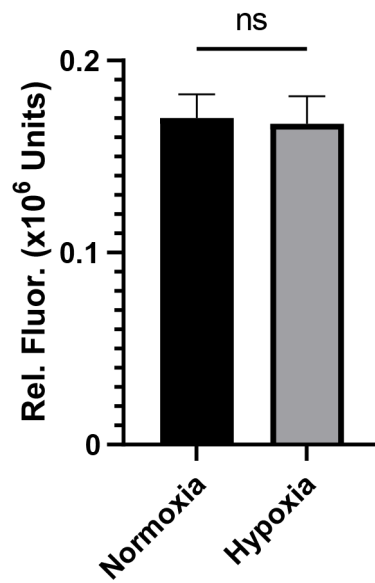

Figure S8. Fluorescence intensity comparison of 20,000 HCT116 cells deposited into paper scaffolds and incubated overnight under hypoxic (1% O<sub>2</sub>) or normoxic (~20% O<sub>2</sub>) conditions. All scaffolds were incubated for 4 h at normoxia before staining with propidium iodide. All scaffolds were stained immediately with propidium iodide following incubation at designated oxygen tensions. Values represent the average of at least 8 separate cultures prepared from at least 2 passages of cells.
